# Supplementary material
Source: HighWire-hosted journal article supplement (https://thorax.bmj.com/highwire/filestream/206580/field_highwire_adjunct_files/1/thorax-2022-219391supp002_data_supplement.pdf)
Supplement: thorax-2022-219391supp002_data_supplement.pdf [file thorax-2022-219391supp002_data_supplement.pdf]

**Supplementary Table 1: Key inclusion and exclusion criteria**

| Inclusion Criteria                                                                                                                                                                                                                                                                                                                                                                                                                                                                                                                                                                               | Exclusion Criteria                                                                                                                                             |
|--------------------------------------------------------------------------------------------------------------------------------------------------------------------------------------------------------------------------------------------------------------------------------------------------------------------------------------------------------------------------------------------------------------------------------------------------------------------------------------------------------------------------------------------------------------------------------------------------|----------------------------------------------------------------------------------------------------------------------------------------------------------------|
| ≥40 years of age                                                                                                                                                                                                                                                                                                                                                                                                                                                                                                                                                                                 | Acute idiopathic pulmonary fibrosis (IPF) exacerbation requiring hospitalisation in the previous 3 months                                                      |
| Forced vital capacity (FVC) ≥40% and ≤90% predicted *                                                                                                                                                                                                                                                                                                                                                                                                                                                                                                                                            | Alternative diagnoses of interstitial lung disease or history of significant environmental exposure that could cause pulmonary fibrosis                        |
| Forced expiratory volume in 1 second (FEV <sub>1</sub> )/FVC ratio ≥0.7                                                                                                                                                                                                                                                                                                                                                                                                                                                                                                                          | Connective tissue disease, asthma, chronic obstructive pulmonary disease, or active infection                                                                  |
| Not taking oral pirfenidone or nintedanib due to national formulary restrictions, or were intolerant to/unwilling to, if previously offered                                                                                                                                                                                                                                                                                                                                                                                                                                                      | High likelihood of death or requiring significant surgery within 6 months                                                                                      |
| A confident diagnosis of IPF according to American Thoracic Society/European Respiratory Society criteria ** within the previous 5 years                                                                                                                                                                                                                                                                                                                                                                                                                                                         | End-stage renal disease requiring dialysis; end-stage liver disease; alanine aminotransferase or aspartate aminotransferase >5 times the upper limit of normal |
| If IPF diagnosis ≥1 year<br>Diagnosis was based on high-resolution computed tomography (HRCT) and/or surgical lung biopsy findings consistent with usual interstitial pneumonia (UIP). If honeycombing was not present on the HRCT, then evidence of disease progression by HRCT and/or an absolute loss of FVC % predicted ≥5% over the previous 12 months was required.<br><br>IPF diagnosis <1 year<br>Typical or probable UIP pattern by HRCT within the previous 12 months was required. If surgical lung biopsy was available, a definite, probable, or possible UIP pattern was required. | Participated in a clinical study within the previous 30 days or 5 half-lives of the previous investigational product                                           |
| Clinical symptoms consistent with IPF ≥1 year duration                                                                                                                                                                                                                                                                                                                                                                                                                                                                                                                                           | Pregnant or breastfeeding                                                                                                                                      |
| A diffusion capacity to carbon monoxide ≥30% and ≤90% predicted                                                                                                                                                                                                                                                                                                                                                                                                                                                                                                                                  |                                                                                                                                                                |
| Fibrotic changes on HRCT scan greater than the extent of emphysema                                                                                                                                                                                                                                                                                                                                                                                                                                                                                                                               |                                                                                                                                                                |
| No evidence of improvement in IPF disease severity over the preceding year                                                                                                                                                                                                                                                                                                                                                                                                                                                                                                                       |                                                                                                                                                                |
| <10% relative change in FVC between screening and first dose                                                                                                                                                                                                                                                                                                                                                                                                                                                                                                                                     |                                                                                                                                                                |

\* Quanjer PH, Stanojevic S, Cole TJ, *et al.* Multi-ethnic reference values for spirometry for the 3-95-yr age range: the global lung function 2012 equations. ERS Global Lung Function Initiative. *Eur Respir J* 2012;40:1324–1343.

\*\* Raghu G, Remy-Jardin M, Myers JL, *et al.* Diagnosis of Idiopathic Pulmonary Fibrosis. An Official ATS/ERS/JRS/ALAT Clinical Practice Guideline. *Am J Respir Crit Care Med* 2018; 198: e44-e68.
